# Supplementary material
Source: PubMed Central journal article supplement (PMC3128972)
Supplement: embor201196s2.pdf [file embor201196s2.pdf]

Manuscript EMBOR-2010-34536

## **ATM-mediated phosphorylation of polynucleotide kinase/phosphatase (PNKP) is required for effective DNA double-strand break repair**

Hava Segal-Raz, Gilad Mass, Keren Baranes-Bachar, Yaniv Lerenthal, Shih-Ya Wang, Young Min Chung, Shelly Ziv-Lehrman, Cecilia E. Strom, Thomas Helleday, Mickey C.-T. Hu, David J. Chen, Yosef Shiloh

*Corresponding author: Yosef Shiloh, Tel-Aviv University*

---

**Review timeline:**

Submission date:

31 October 2010

Accepted:

19 April 2011

---

**No Peer Review Process File is available with this article, as the authors have chosen not to make the review process public in this case.**
